# Supplementary material
Source: ML conference proceedings conference paper supplement (https://openreview.net/forum?id=Vsoor99Ts6)

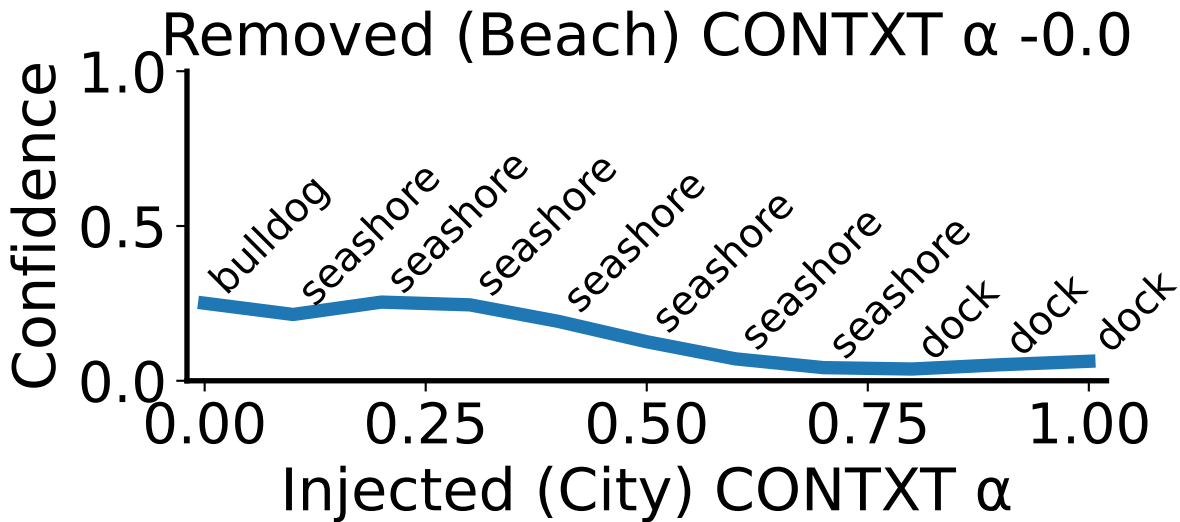

Supplement: supplementary_material [file cowBeach-Add City - sub Beach-SubWeight-0.000000.pdf › 25/imagesOutputsSub/cowBeach-Add City - sub Beach-SubWeight-0.000000.pdf]

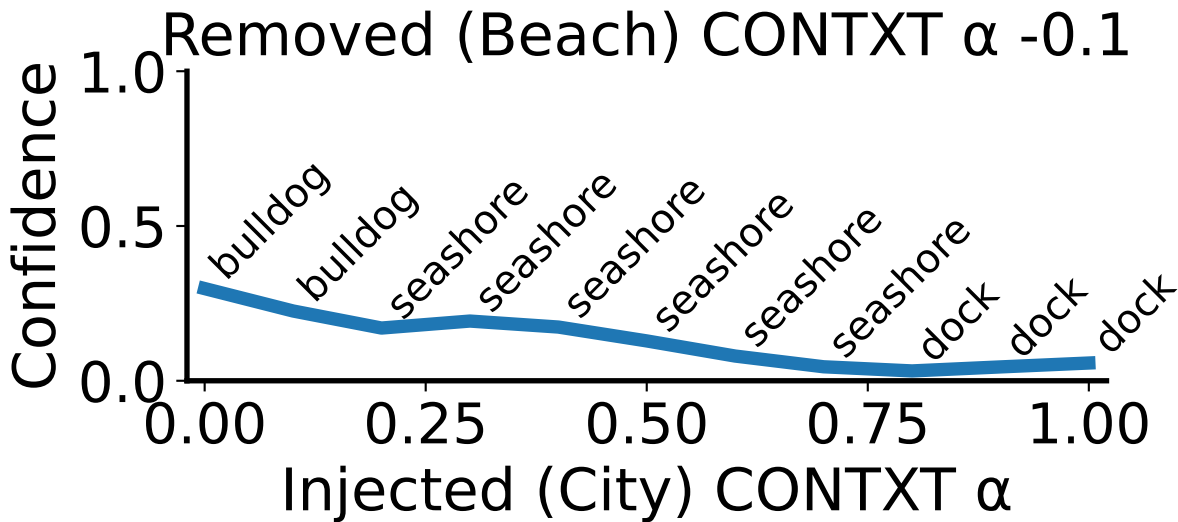

Supplement: supplementary_material [file cowBeach-Add City - sub Beach-SubWeight-0.100000.pdf › 25/imagesOutputsSub/cowBeach-Add City - sub Beach-SubWeight-0.100000.pdf]

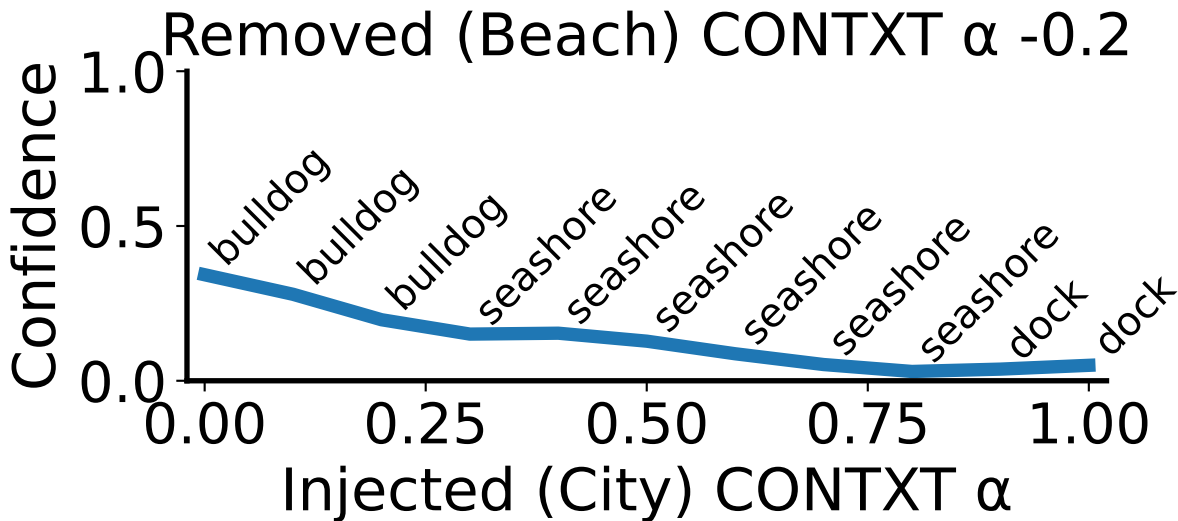

Supplement: supplementary_material [file cowBeach-Add City - sub Beach-SubWeight-0.200000.pdf › 25/imagesOutputsSub/cowBeach-Add City - sub Beach-SubWeight-0.200000.pdf]

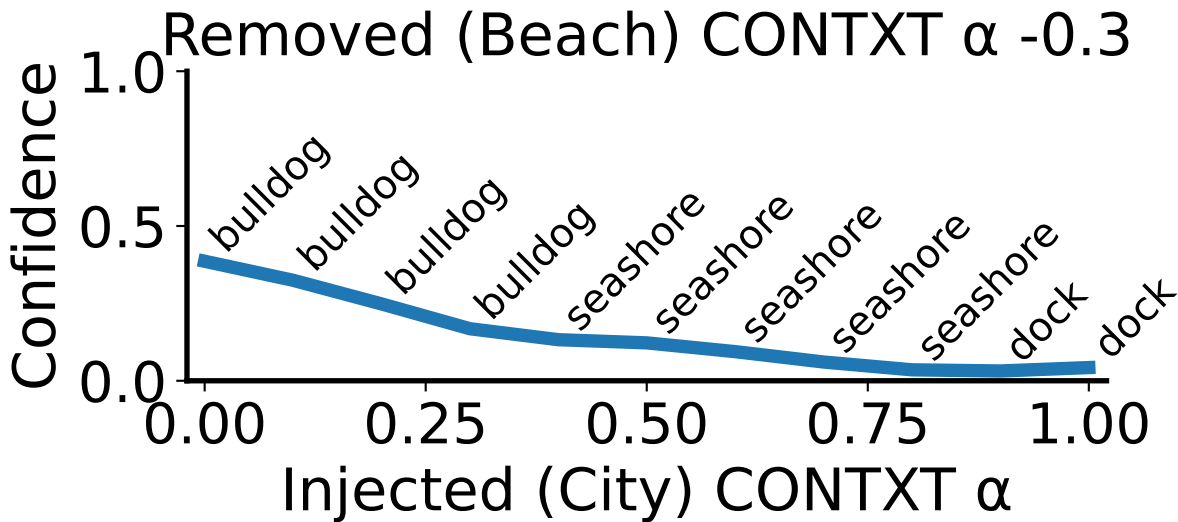

Supplement: supplementary_material [file cowBeach-Add City - sub Beach-SubWeight-0.300000.pdf › 25/imagesOutputsSub/cowBeach-Add City - sub Beach-SubWeight-0.300000.pdf]

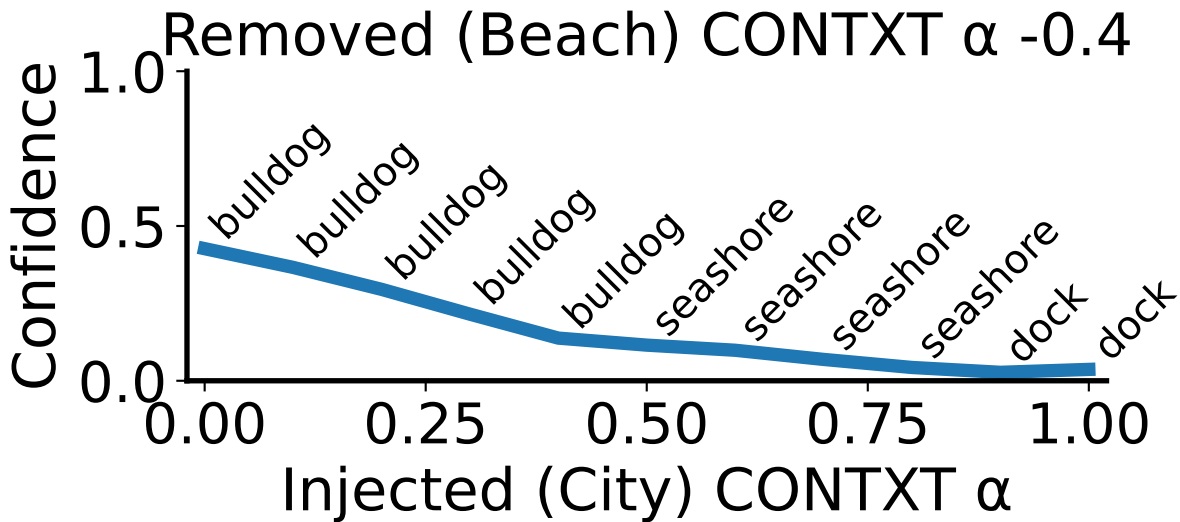

Supplement: supplementary_material [file cowBeach-Add City - sub Beach-SubWeight-0.400000.pdf › 25/imagesOutputsSub/cowBeach-Add City - sub Beach-SubWeight-0.400000.pdf]

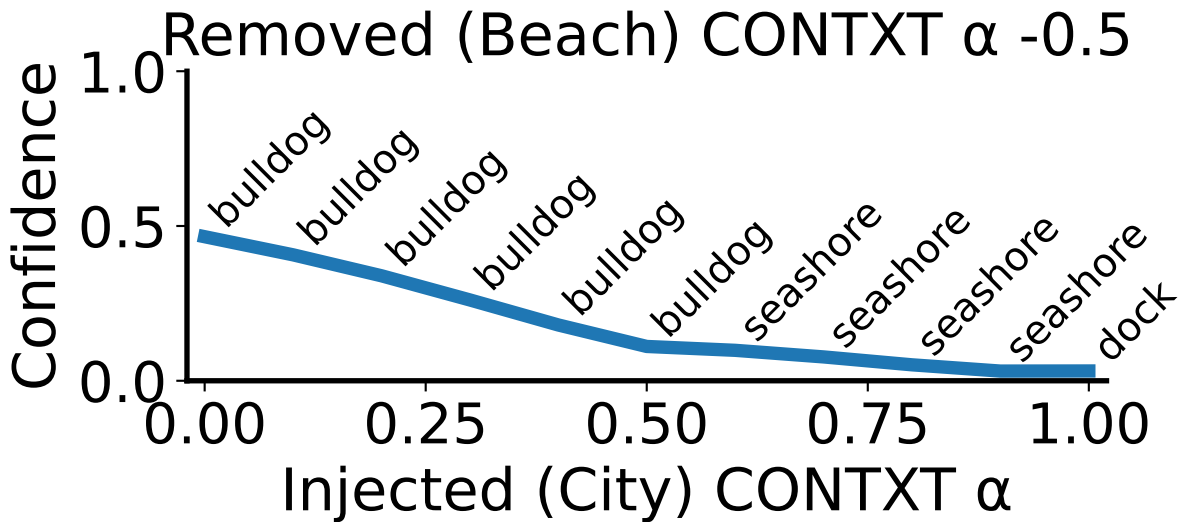

Supplement: supplementary_material [file cowBeach-Add City - sub Beach-SubWeight-0.500000.pdf › 25/imagesOutputsSub/cowBeach-Add City - sub Beach-SubWeight-0.500000.pdf]

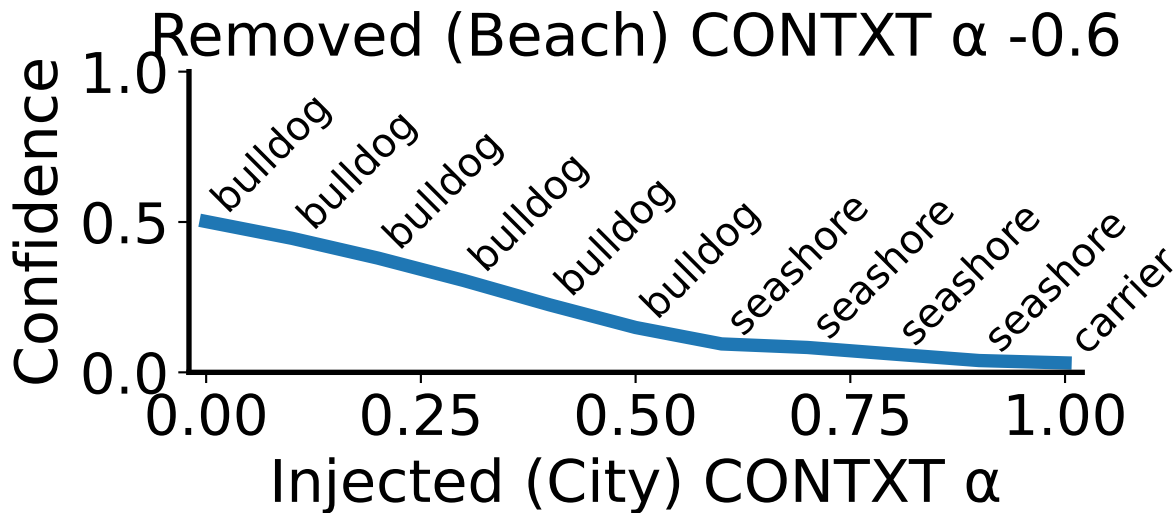

Supplement: supplementary_material [file cowBeach-Add City - sub Beach-SubWeight-0.600000.pdf › 25/imagesOutputsSub/cowBeach-Add City - sub Beach-SubWeight-0.600000.pdf]

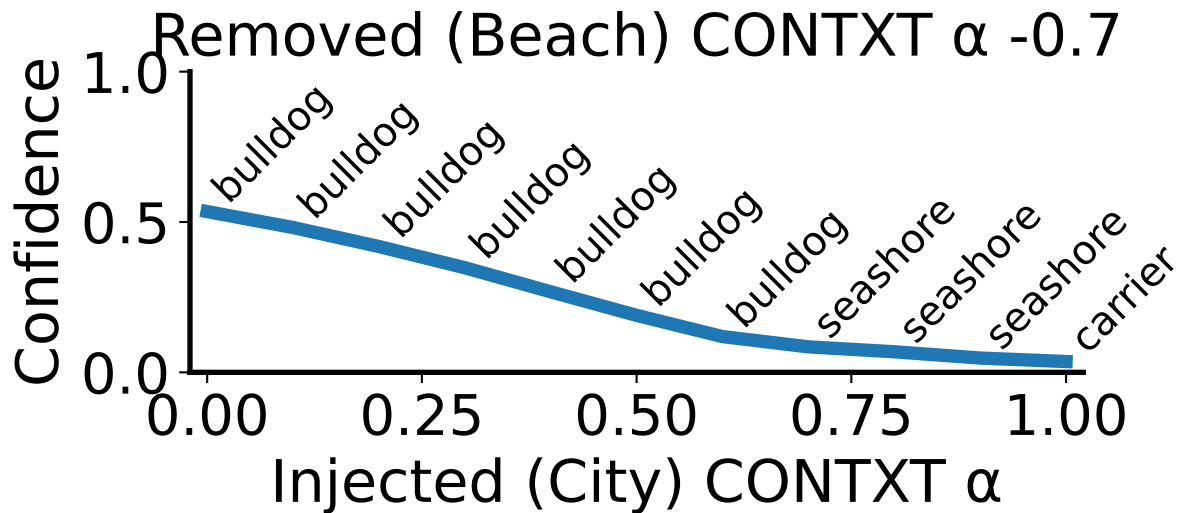

Supplement: supplementary_material [file cowBeach-Add City - sub Beach-SubWeight-0.700000.pdf › 25/imagesOutputsSub/cowBeach-Add City - sub Beach-SubWeight-0.700000.pdf]

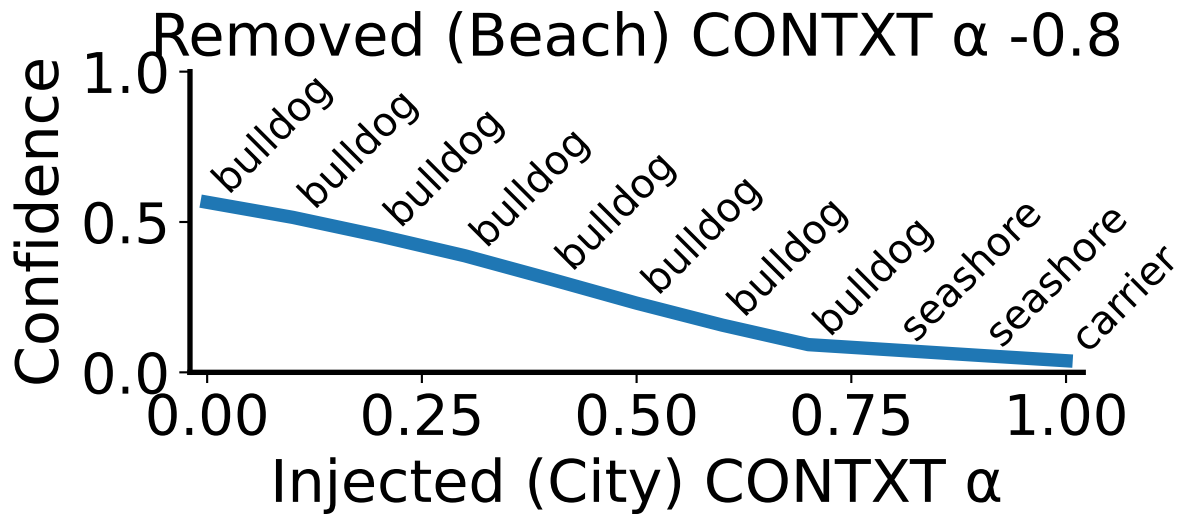

Supplement: supplementary_material [file cowBeach-Add City - sub Beach-SubWeight-0.800000.pdf › 25/imagesOutputsSub/cowBeach-Add City - sub Beach-SubWeight-0.800000.pdf]

Removed (Beach) CONTEXT  $\alpha$  -0.9

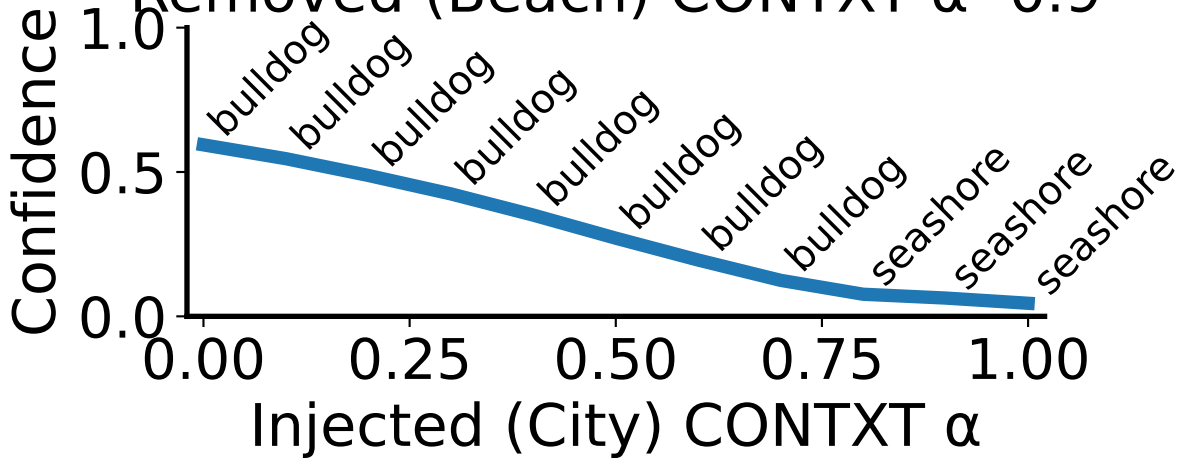

Supplement: supplementary_material [file cowBeach-Add City - sub Beach-SubWeight-0.900000.pdf › 25/imagesOutputsSub/cowBeach-Add City - sub Beach-SubWeight-0.900000.pdf]

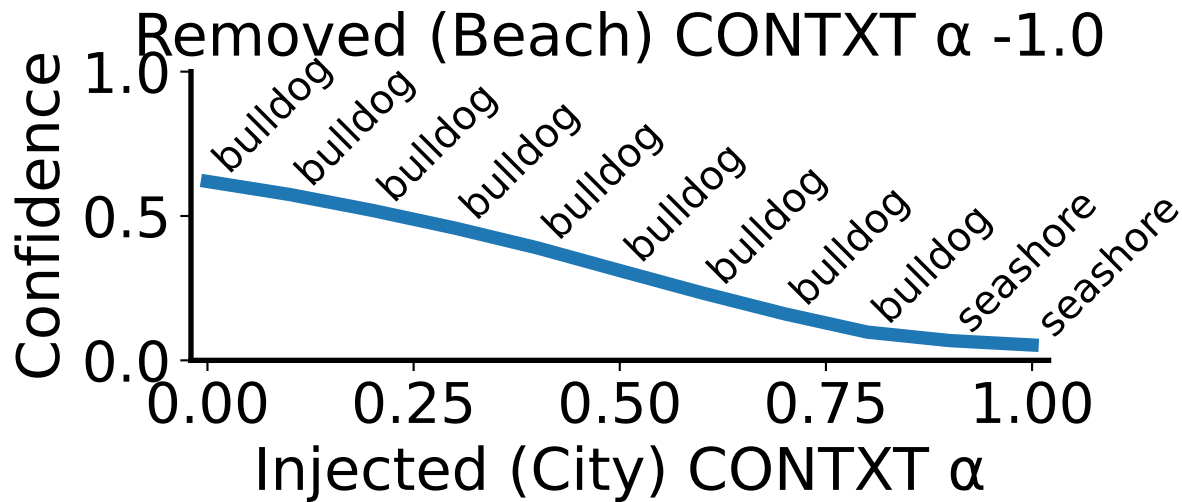

Supplement: supplementary_material [file cowBeach-Add City - sub Beach-SubWeight-1.000000.pdf › 25/imagesOutputsSub/cowBeach-Add City - sub Beach-SubWeight-1.000000.pdf]

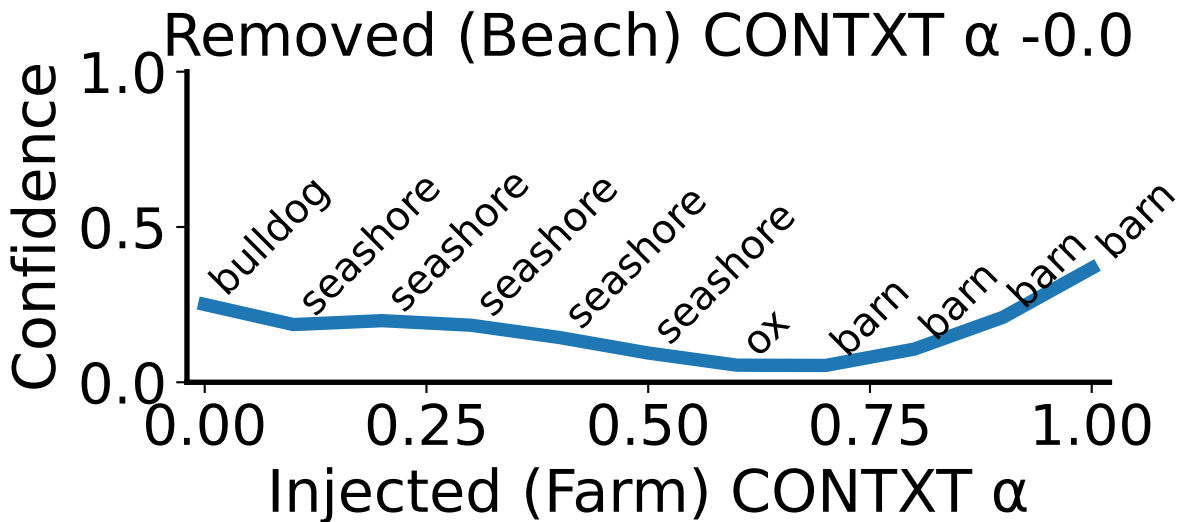

Supplement: supplementary_material [file cowBeach-Add Farm - sub Beach-SubWeight-0.000000.pdf › 25/imagesOutputsSub/cowBeach-Add Farm - sub Beach-SubWeight-0.000000.pdf]

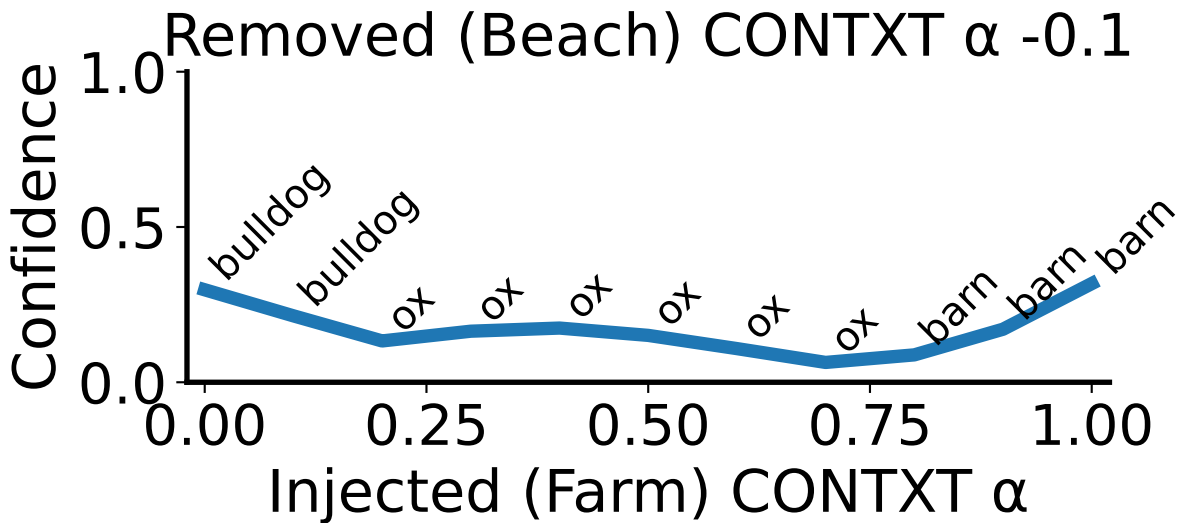

Supplement: supplementary_material [file cowBeach-Add Farm - sub Beach-SubWeight-0.100000.pdf › 25/imagesOutputsSub/cowBeach-Add Farm - sub Beach-SubWeight-0.100000.pdf]

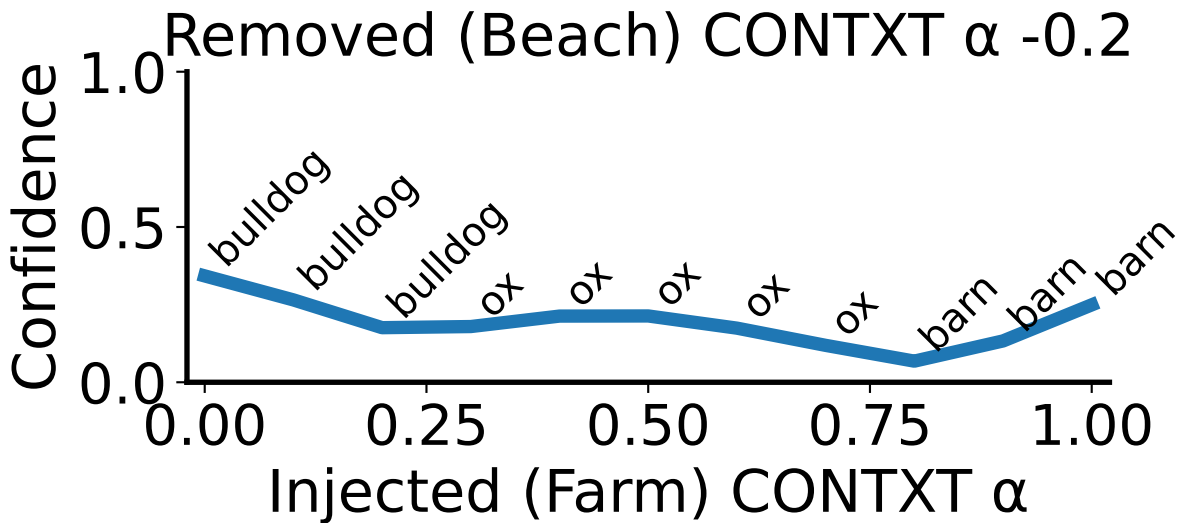

Supplement: supplementary_material [file cowBeach-Add Farm - sub Beach-SubWeight-0.200000.pdf › 25/imagesOutputsSub/cowBeach-Add Farm - sub Beach-SubWeight-0.200000.pdf]

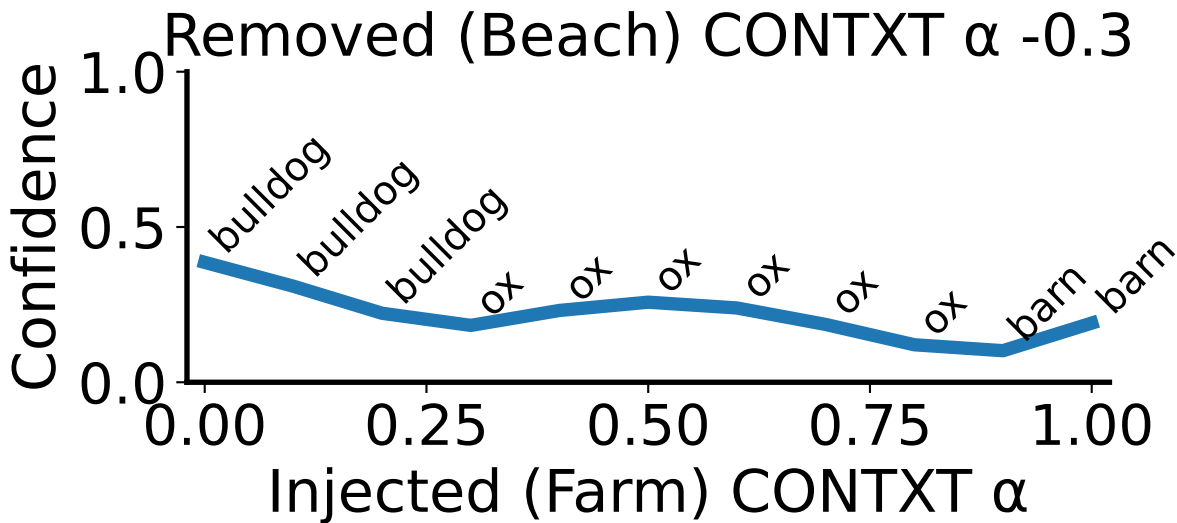

Supplement: supplementary_material [file cowBeach-Add Farm - sub Beach-SubWeight-0.300000.pdf › 25/imagesOutputsSub/cowBeach-Add Farm - sub Beach-SubWeight-0.300000.pdf]

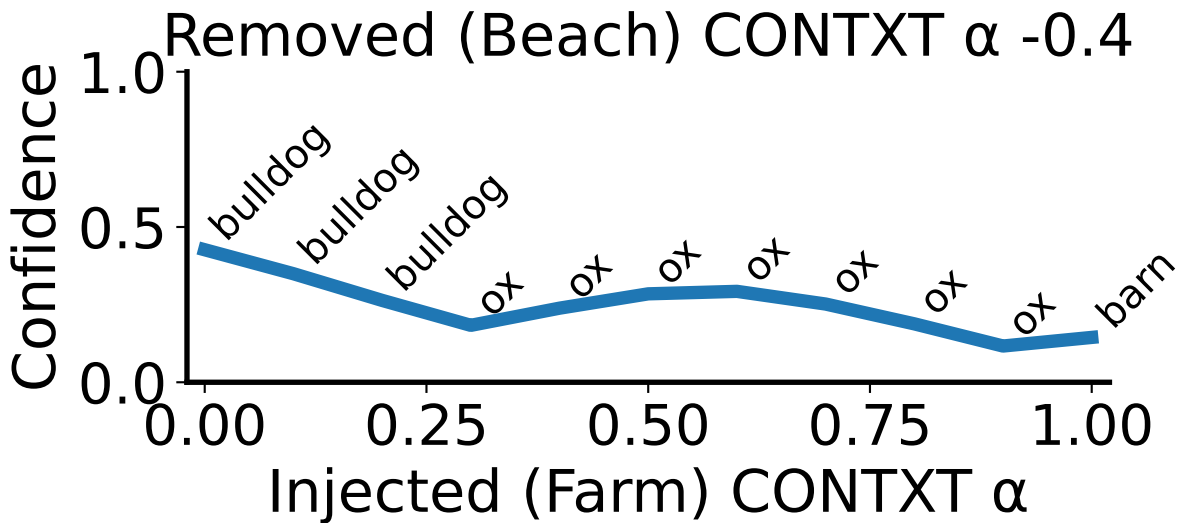

Supplement: supplementary_material [file cowBeach-Add Farm - sub Beach-SubWeight-0.400000.pdf › 25/imagesOutputsSub/cowBeach-Add Farm - sub Beach-SubWeight-0.400000.pdf]

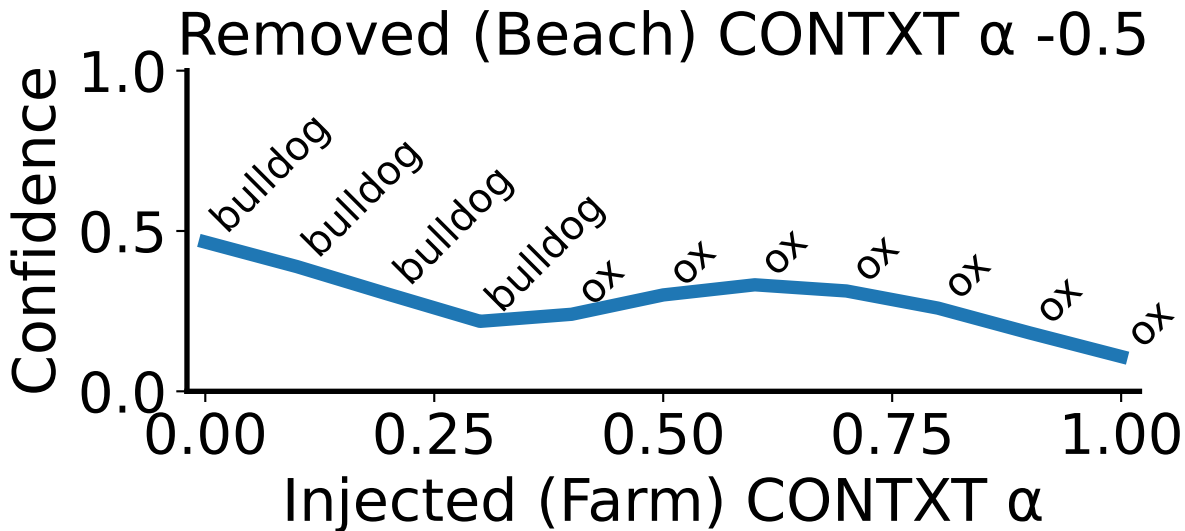

Supplement: supplementary_material [file cowBeach-Add Farm - sub Beach-SubWeight-0.500000.pdf › 25/imagesOutputsSub/cowBeach-Add Farm - sub Beach-SubWeight-0.500000.pdf]

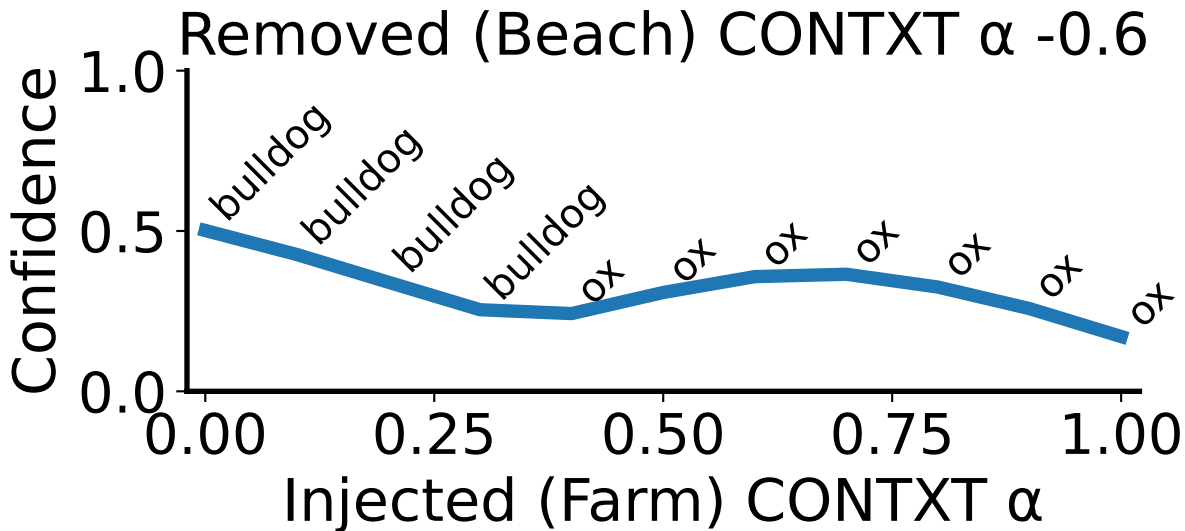

Supplement: supplementary_material [file cowBeach-Add Farm - sub Beach-SubWeight-0.600000.pdf › 25/imagesOutputsSub/cowBeach-Add Farm - sub Beach-SubWeight-0.600000.pdf]

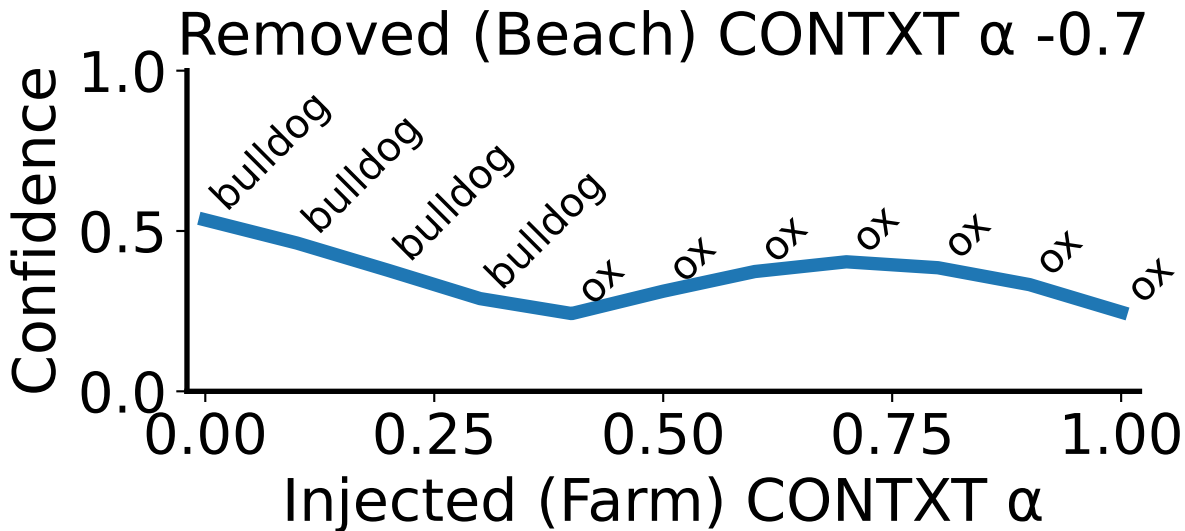

Supplement: supplementary_material [file cowBeach-Add Farm - sub Beach-SubWeight-0.700000.pdf › 25/imagesOutputsSub/cowBeach-Add Farm - sub Beach-SubWeight-0.700000.pdf]

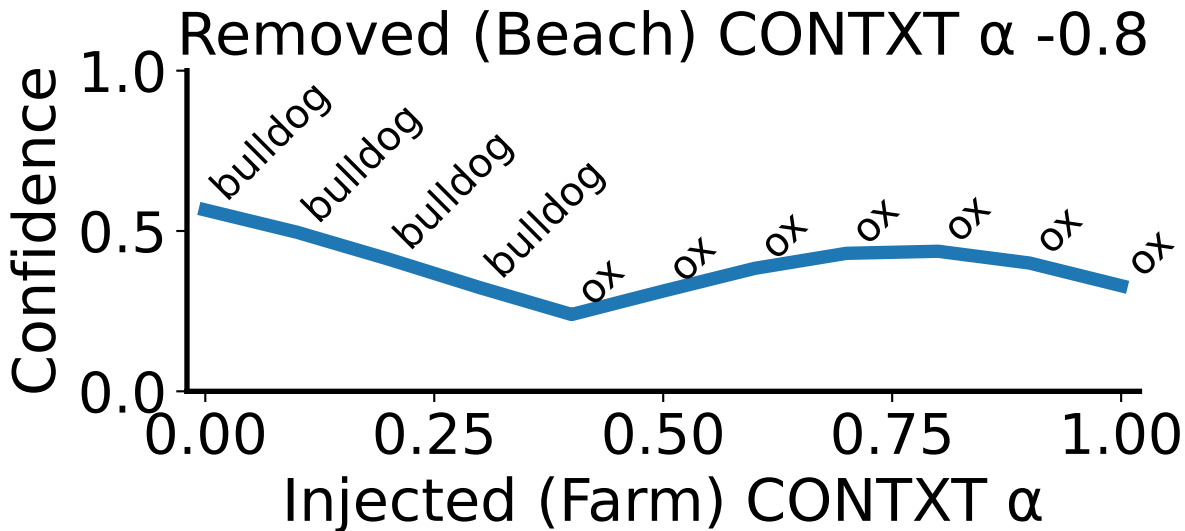

Supplement: supplementary_material [file cowBeach-Add Farm - sub Beach-SubWeight-0.800000.pdf › 25/imagesOutputsSub/cowBeach-Add Farm - sub Beach-SubWeight-0.800000.pdf]

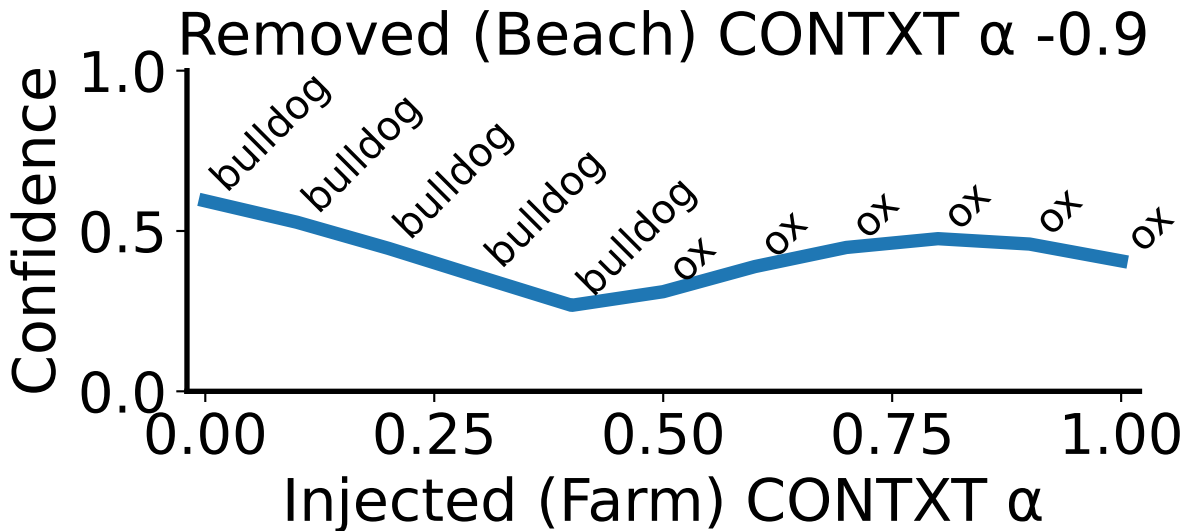

Supplement: supplementary_material [file cowBeach-Add Farm - sub Beach-SubWeight-0.900000.pdf › 25/imagesOutputsSub/cowBeach-Add Farm - sub Beach-SubWeight-0.900000.pdf]

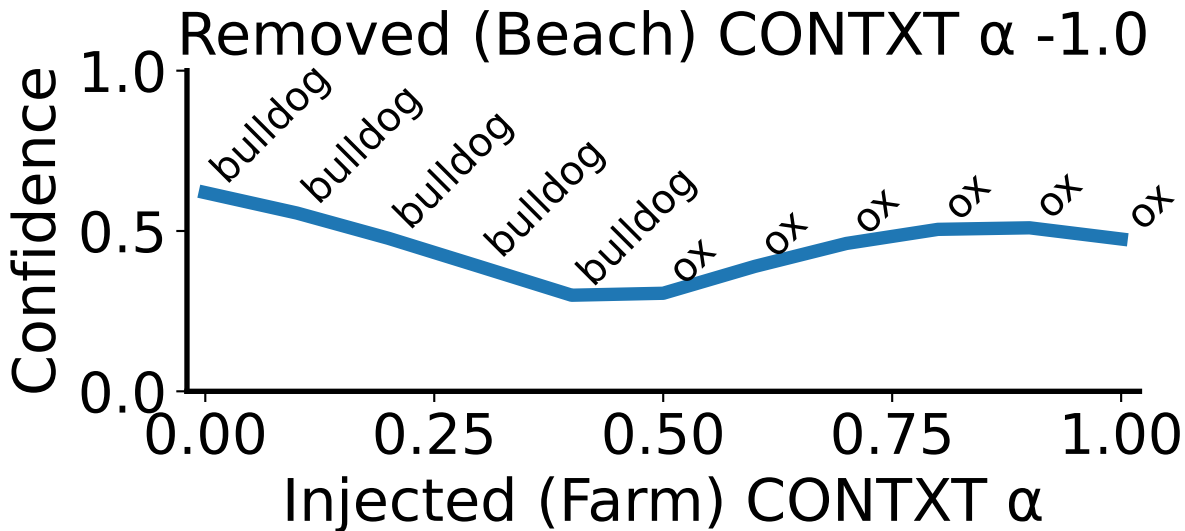

Supplement: supplementary_material [file cowBeach-Add Farm - sub Beach-SubWeight-1.000000.pdf › 25/imagesOutputsSub/cowBeach-Add Farm - sub Beach-SubWeight-1.000000.pdf]

# Llama 70B

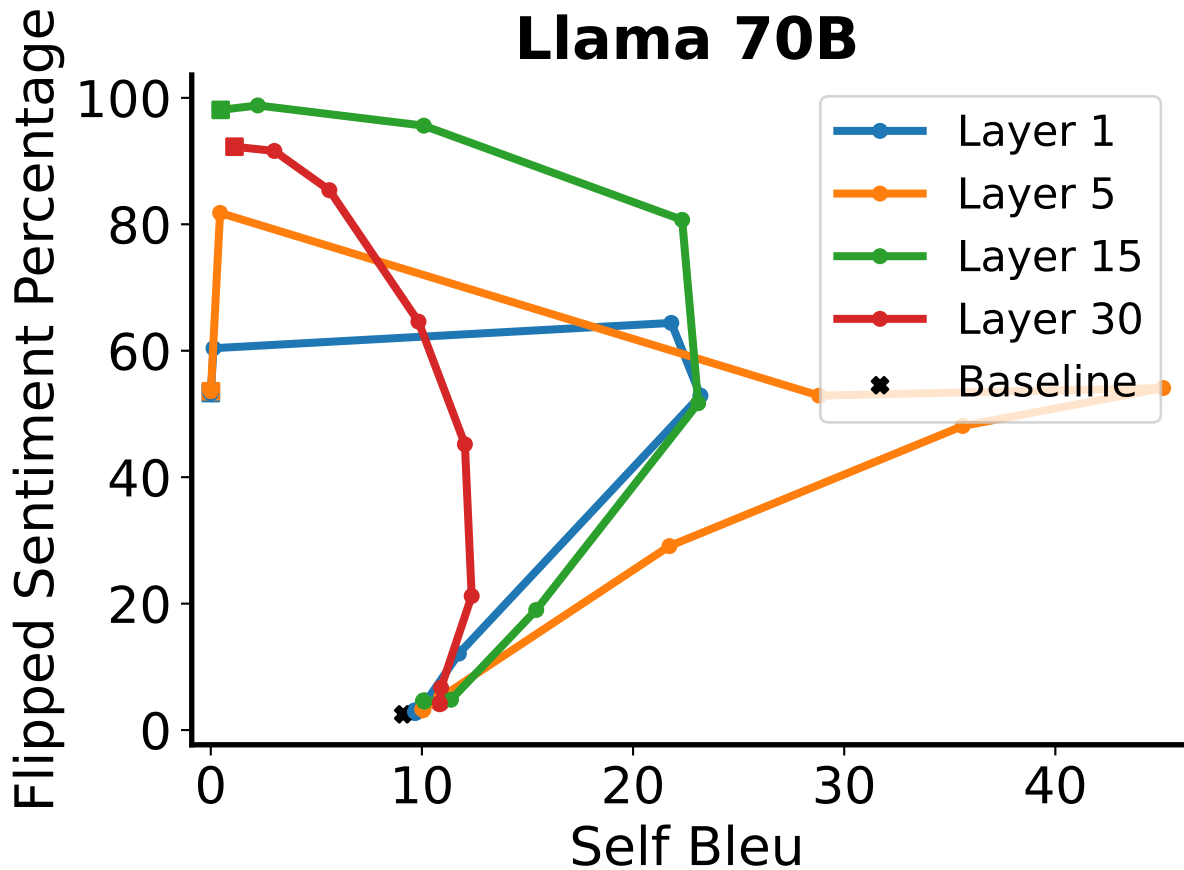

Supplement: supplementary_material [file bleuVsFlip.pdf › paperllm/llama70b/_plots/bleuVsFlip.pdf]

# Llama 8B

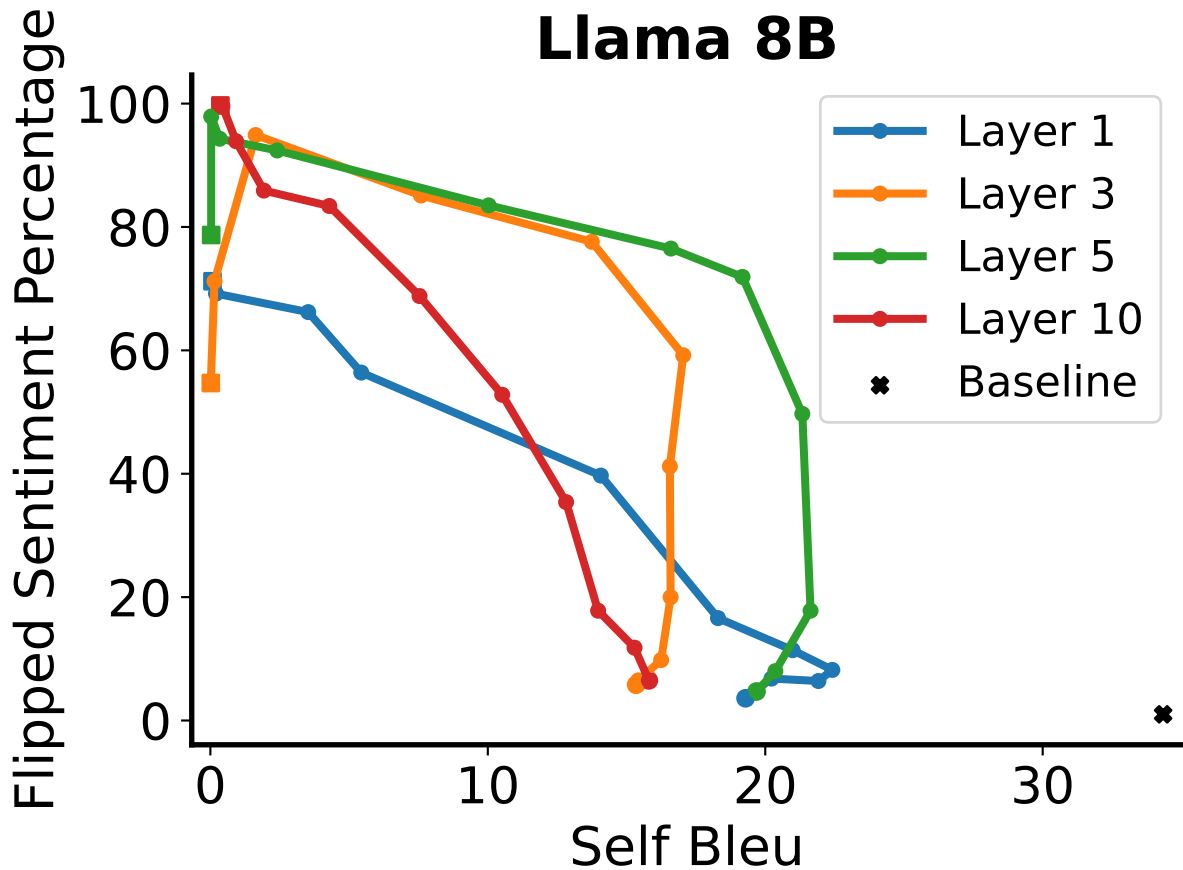

Supplement: supplementary_material [file bleuVsFlip.pdf › paperllm/llama8b/_paper_plots/bleuVsFlip.pdf]
